# Supplementary material for: Role of the central junction in folding topology of the protein-free human U2–U6 snRNA complex
Source: PubMed Central journal article supplement — RNA. 2020 Jul;26(7):836–50. doi: 10.1261/rna.073379.119 (PMC7297123; doi:10.1261/rna.073379.119), 2020-07

**Figure S2:** The exponential decay fitting process for (A): fluorescein (Donor) undergoing FRET to Cy3 (Acceptor) in Construct WT $\Delta$ L. The blue decay curve is instrument response. The red decay curve is for fluorescein in response to pulses at 495 nm. The solid green curve was a best fit by a biexponential curve corresponding to two lifetimes of  $3.87 \pm 0.01$  (91.4%) and  $0.89 \pm 0.06$  ns (8.6%). (B) Display of residuals derived from fit with a mono-exponential curve indicates a poor fit (CHISQ=2.67); (C) Display of residuals derived from fit with a biexponential curve indicates a better fit ( $\chi^2 = 1.15$ ).

**A**

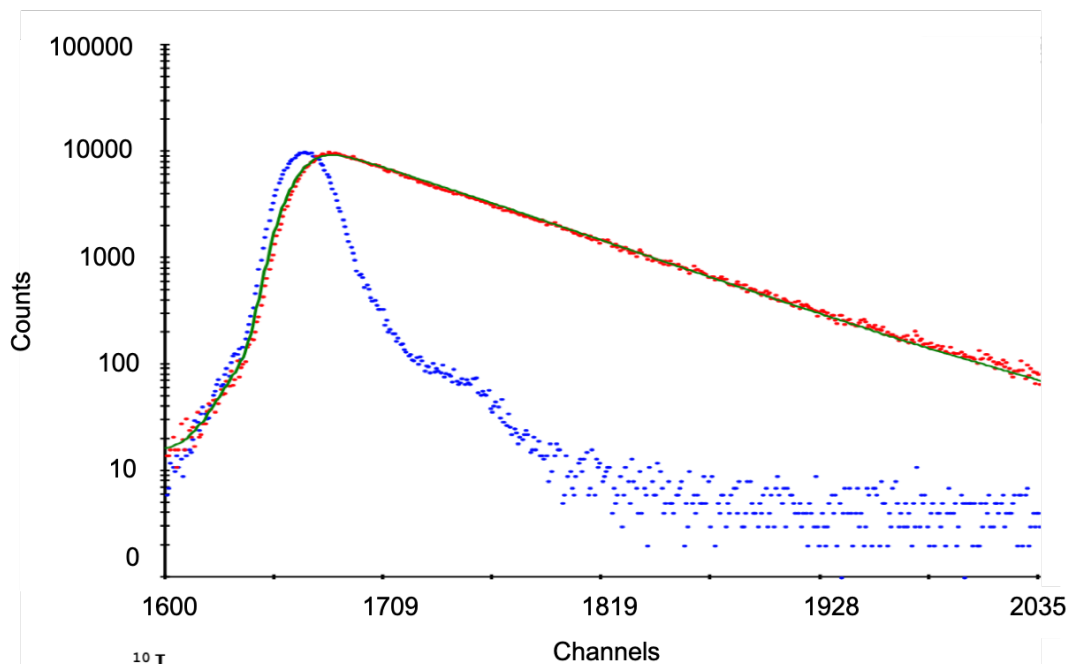

**B**

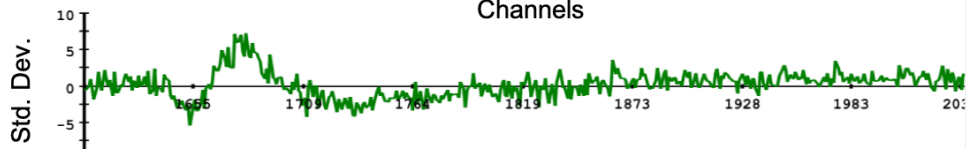

**C**

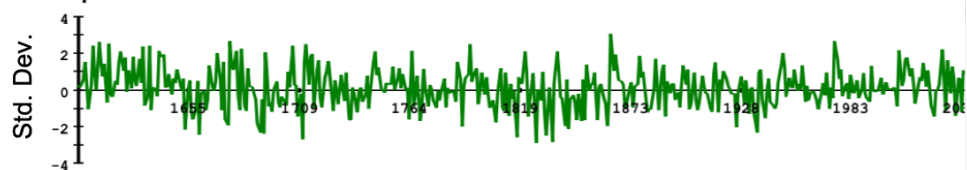

Supplement: supp_073379.119_Supplemental_Fig_S2.pdf [file supp_073379.119_Supplemental_Fig_S2.pdf]
