# Supplementary material for: Role of the central junction in folding topology of the protein-free human U2–U6 snRNA complex
Source: PubMed Central journal article supplement — RNA. 2020 Jul;26(7):836–50. doi: 10.1261/rna.073379.119 (PMC7297123; doi:10.1261/rna.073379.119), 2020-07

**Figure S3:** The representative EMSA gel showing the binding of RBM22 with Construct WT $\Delta$ L (lane 1, 3, 5) and Construct 4HJ $\Delta$ L1 (lane 2, 4, 6). The concentration of RBM was remained constant at 10  $\mu$ M in all lanes whereas the concentration of RNAs varied from 5  $\mu$ M to 15  $\mu$ M. The gel was run in 30 mM MOPs, 25 mM Histidine buffer pH 6.5 at 4°C for 90 minutes and then stained with Commasie® Blue overnight. Only RBM22 and RNA-RBM22 complex bands were exposed after staining with Commasie® Blue. The RNA-protein band was visualized at 302 nm. The gel visually shows a greater binding affinity of RBM22 for the wild-type complex.

Lane 1: 5  $\mu$ M WT $\Delta$ L + 10  $\mu$ M RBM22

Lane 2: 5  $\mu$ M 4HJ $\Delta$ L1 + 10  $\mu$ M RBM22

Lane 3: 10  $\mu$ M WT $\Delta$ L + 10  $\mu$ M RBM22

Lane 4: 10  $\mu$ M 4HJ $\Delta$ L1 + 10  $\mu$ M RBM22

Lane 5: 15  $\mu$ M WT $\Delta$ L + 10  $\mu$ M RBM22

Lane 6: 15  $\mu$ M 4HJ $\Delta$ L1 + 10  $\mu$ M RBM22

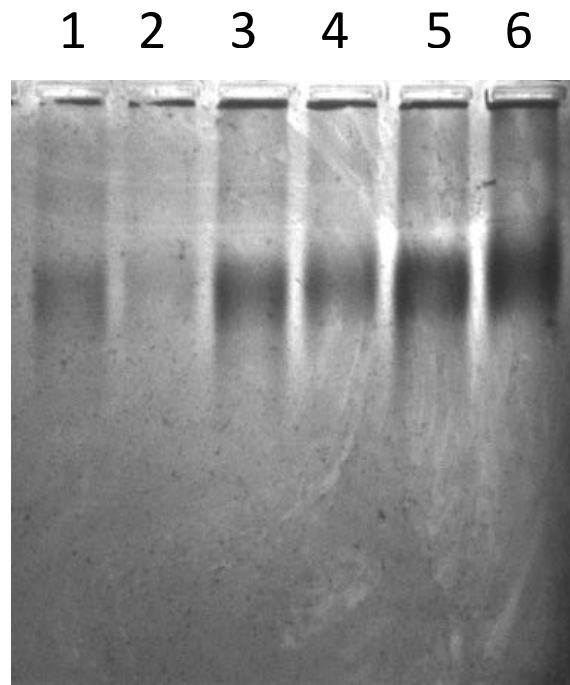

Supplement: supp_073379.119_Supplemental_Fig_S3.pdf [file supp_073379.119_Supplemental_Fig_S3.pdf]
