# Supplementary material for: Role of the central junction in folding topology of the protein-free human U2–U6 snRNA complex
Source: PubMed Central journal article supplement — RNA. 2020 Jul;26(7):836–50. doi: 10.1261/rna.073379.119 (PMC7297123; doi:10.1261/rna.073379.119), 2020-07

**Figure S4:** Non-denaturing polyacrylamide gel electrophoresis used to analyze pairing of equimolar concentrations of RNA strands of U2-U6 snRNA constructs. **Left:** Pairing of strands of construct WT (see legend of Figure 1F). Lane 1: 32 nucleotide (nt) fragment representing the 5' region of U6 snRNA (Helix III through the 5' side of the U6 ISL); Lane 2: 74 nt U6-U2 “chimeric” fragment containing the 3' side of U6 ISL linked to the U2 strand *via* a GCAA tetraloop; Lane 3: Equimolar concentrations of strands in Lane 1 and Lane 2 paired to form construct F. The shift shown in Lane 3, with no residual band in Lanes 1 or 2, indicates complete and stoichiometric pairing between strands. **Right:** Pairing of strands of construct 4HJΔL3 (Figure 1D). Lane 4: 44 nt U2 snRNA strand; Lane 5: 65 nt U6 snRNA strand; Lane 6: Equimolar concentrations of strands in Lane 4 and Lane 5 paired to form construct 4HJΔL3. The shift shown in Lane 6, with no residual band in Lanes 4 or 5, indicates complete and stoichiometric pairing between strands.

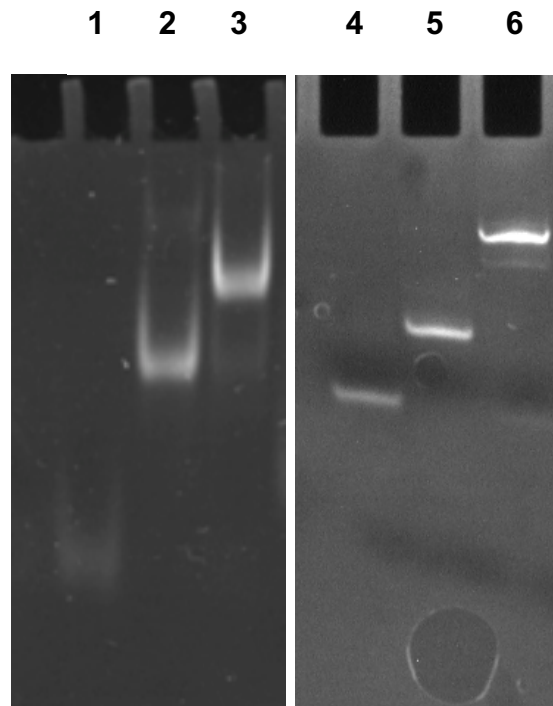

Supplement: supp_073379.119_Supplemental_Fig_S4.pdf [file supp_073379.119_Supplemental_Fig_S4.pdf]
