# Supplementary material for: Role of the central junction in folding topology of the protein-free human U2–U6 snRNA complex
Source: PubMed Central journal article supplement — RNA. 2020 Jul;26(7):836–50. doi: 10.1261/rna.073379.119 (PMC7297123; doi:10.1261/rna.073379.119), 2020-07
Supplement: supp_073379.119_Supplemental_Methods.pdf [file supp_073379.119_Supplemental_Methods.pdf]

### ***RBM22: Expression and Purification***

RBM22 fragment (146-420) was cloned in BL21 pET-15b by GenScript. Cells were incubated at 37 °C until  $OD_{600} \sim 0.6$  and at 17 °C for induction with 1mM IPTG then harvested after 24 hours. Cell pellets were first suspended in lysis buffer (50 mM HEPES, pH 7.5, 2mM  $\beta$ -mecaptoethanol) containing RNase I; sonicated with a Sonic Dismembrator at Set 3 (10-11 Watts) and then centrifuged at 10000 rpm at 4°C for 1hour. Supernatant containing soluble RBM22 was purified by Ion-EXchange chromatography (IEX), followed by Immobilized Metal Affinity Chromatography (IMAC). Lysate supernatant was loaded on HiTrap SP 5ml column and eluted with a gradient of NaCl (from 0 M to 1 M concentraion). The fractions containing most of RBM22 from IEX were purified further by IMAC in an ÄKTA Purifier FPLC (GE Healthcare) with HisTrap HP 5 ml column and eluted with an Imidazole gradient (from 10 mM to 1 M). The eluent was dialyzed against phosphate buffer containing 20 mM NaPi, 100 mM NaCl, 1 mM DTT, 5% glycerol, pH 6.5 using a Float-A-Lyzer with molecular weight cut off (MWCO) of 20 kDa and then concentrated down to 200-400  $\mu$ l using Amicon Ultra centrifugal device (Millipore) with MWCO of 3kDa. Purify and integrity of RBM22 was confirmed by migration on a SDS-PAGE gel and a non-denaturing PAGE gel which were visualized by staining with Commasie® Blue. RBM22 concentration was determined using Bradford Assay using the Coomassie® Protein Assay Reagent Kit from Pierce Biotechnology with BSA as standard.
